# Supplementary material
Source: publisher figshare collection journal article supplement (https://gsapubs.figshare.com/articles/dataset/_/19097615)
Supplement: Supplementary file 1 [file 1]

### **Appendix S3**

This Supplemental Material accompanies

Malone, D.H., Craddock, J.P., and Konstantinou, A., 2022, Timing and structural evolution of the Sevier thrust belt, western Wyoming, in Craddock, J.P., Malone, D.H., Foreman, B.Z., and Konstantinou, A., eds., Tectonic Evolution of the Sevier-Laramide Hinterland, Thrust Belt, and Foreland, and Postorogenic Slab Rollback (180–20 Ma): Geological Society of America Special Paper 555, [https://doi.org/10.1130/2022.2555\(04\)](https://doi.org/10.1130/2022.2555(04)).

**Table A: Microprobe Analyses of Archean Teton Range and Stump Fm. Detrital Garnets**

| Sample | Tetons 1 | Tetons 2 | Tetons 3 | Tetons 4 | Tetons 5 | Tetons 6 | Tetons 7 | Tetons 8 | Tetons 9 |
|--------|----------|----------|----------|----------|----------|----------|----------|----------|----------|
| SiO2   | 35.89    | 35.74    | 37.07    | 36.23    | 35.03    | 35.95    | 36.27    | 36.58    | 37.32    |
| TiO2   | -0.01    | 0.01     | 0.01     | 0.01     | -1.01    | -0.01    | 0.01     | 0.028    | 0.035    |
| Al2O3  | 21.07    | 21.2     | 21.67    | 21.31    | 21.18    | 20.94    | 20.96    | 21.11    | 21.47    |
| Cr2O3  | 0.03     | -0.04    | 0.01     | 0.02     | -0.02    | 0.02     | -0.01    | -0.02    | -0.01    |
| FeO    | 33.46    | 33.57    | 33.28    | 33.51    | 33.38    | 32.83    | 33.28    | 33.81    | 33.28    |
| MnO    | 6.3      | 6.31     | 6.62     | 6.53     | 6.31     | 6.51     | 6.33     | 6.28     | 6.22     |
| MgO    | 1.22     | 1.23     | 1.223    | 1.227    | 1.18     | 1.18     | 1.215    | 1.19     | 1.223    |
| CaO    | 0.24     | 0.26     | 0.23     | 0.23     | 0.266    | 0.217    | 0.261    | 0.28     | 0.279    |
| Total  | 98.2     | 98.2     | 100.1    | 99       | 97.3     | 97.6     | 98.3     | 99.2     | 99.8     |

Table B- Clast Composition of the Conglomerate at  
McDougal Gap.

| Parent Material        | Location 1 | Location 2 |
|------------------------|------------|------------|
| Miss. Madison          |            |            |
| carbonates             | 60%        | 15%        |
| Penn Wells Fm.         | 10%        | 15%        |
| Penn Amsden Fm.        | 5%         | 20%        |
| Permian Phosphoria Fm. | 5%         | 0%         |
| Triassic Woodside Fm.  | 0%         | 5%         |
| Quartzite clasts       | 0%         | 0%         |
| Matrix                 | 20%        | 45%        |

Table C-Palynology Results from McDougal Gap Conglomerate

|                             | Conglomerate Samples |           |           |           | Surface Lichen Samples |           |           |           |
|-----------------------------|----------------------|-----------|-----------|-----------|------------------------|-----------|-----------|-----------|
|                             | 1                    | 2         | 3         | 4         | 1                      | 2         | 3         | 4         |
|                             | Count (%)            | Count (%) | Count (%) | Count (%) | Count (%)              | Count (%) | Count (%) | Count (%) |
| CONIFERS                    |                      |           |           |           |                        |           |           |           |
| Abies                       | 21(2)                | 22(6)     | 13        | 14        | 13                     | 10        | 14(5)     | 10(12)    |
| Picea                       | 3(11)                | 3(31)     | 7(1)      | 7(13)     | 10(1)                  | 8(5)      | 16 (9)    | 12(21)    |
| Pinus                       | 35(21)               | 37(60)    | 43(7)     | 45(88)    | 45(19)                 | 36(95)    | 46(29)    | 33(67)    |
| Tsuga mertensia             | 1                    | 1         | 1         | 1         | 0                      | 0         | 2         | 1         |
| Tsuga heterophyll           | 0                    | 0         | 0         | 0         | 1                      | 1         | 0         | 0         |
| Pseudsuga                   | 4                    | 4         | 0         | 0         | 2                      | 2         | 5         | 4         |
| DECIDUOUS TREES             |                      |           |           |           |                        |           |           |           |
| Quercus                     | 0                    | 0         | 1         | 1         | 0                      | 0         | 0         | 0         |
| Betula                      | 0(1)                 | 0(1)      | 0         | 0         | 0                      | 0         | 1         | 1         |
| Populus                     | 0                    | 0         | 1         | 1         | 3                      | 2         | 0         | 1         |
| Ulmus                       | 0                    | 0         | 2         | 2         | 0                      | 0         | 0         | 0         |
| Tilia (?)                   | 2                    | 2         | 0         | 0         | 0                      | 0         | 0         | 0         |
| Alnus                       | 0                    | 0         | 1         | 1         | 1                      | 1         | 2         | 1         |
| Juglana(?)                  | 0                    | 0         | 0         | 0         | 0                      | 0         | 1         | 1         |
| Salix                       | 0                    | 0         | 1         | 1         | 0                      | 0         | 2         | 1         |
| SHRUBS & HERBS              |                      |           |           |           |                        |           |           |           |
| Rhus(?)                     | 1                    | 1         | 0         | 0         | 0                      | 0         | 0         | 0         |
| Ephedra                     | 0                    | 0         | 0         | 0         | 0                      | 0         | 1         | 1         |
| Cyperaceae                  | 0                    | 0         | 0         | 0         | 1                      | 1         | 2         | 1         |
| Gramineae                   | 6                    | 6         | 5         | 5         | 4                      | 3         | 13        | 9         |
| Chenopod-                   |                      |           |           |           |                        |           |           |           |
| Amaranth                    | 4                    | 4         | 0         | 0         | 3                      | 2         | 5         | 4         |
| Caryophyllaceae             | 0                    | 0         | 1         | 1         | 2                      | 2         | 0         | 0         |
| Saxifragaceae(?)            |                      |           |           |           |                        |           |           |           |
|                             | 3                    | 3         | 3         | 3         | 1                      | 1         | 3         | 2         |
| Rosaceae                    | 3                    | 3         | 1         | 1         | 2                      | 2         | 0         | 0         |
| Leguminosae                 | 1                    | 1         | 0         | 0         | 0                      | 0         | 0         | 0         |
| Plantago                    | 1                    | 1         | 0         | 0         | 1                      | 1         | 0         | 0         |
| Shepherdia                  | 0                    | 0         | 0         | 0         | 1                      | 1         | 0         | 0         |
| Ambrosia                    | 4                    | 4         | 2         | 2         | 0                      | 0         | 1         | 1         |
| Artemisia                   | 5                    | 5         | 14        | 15        | 27                     | 22        | 17        | 12        |
| Others                      | 0                    | 0         | 0         | 0         | 7                      | 6         | 8         | 6         |
| POLLEN SUM (eroded grains)  |                      |           |           |           |                        |           |           |           |
|                             | 94(35)               | 97        | 96 (8)    | 100       | 124(20)                | 101       | 139(43)   | 101       |
| AQUATICS                    |                      |           |           |           |                        |           |           |           |
| Sparganium                  | 0                    |           | 0         |           | 0                      |           | 1         |           |
| Potamogeton                 | 0                    |           | 0         |           | 1                      |           | 0         |           |
| FERNS & ALLIES              |                      |           |           |           |                        |           |           |           |
|                             | 0                    |           | 0         |           | 0                      |           | 0         |           |
| BROPHYTES                   |                      |           |           |           |                        |           |           |           |
| Alete Spores                | 1                    |           | 0         |           | 0                      |           | 0         |           |
| FUNGI                       |                      |           |           |           |                        |           |           |           |
| Puccinia teleutosps         | 1                    |           | 0         |           | 0                      |           | 3         |           |
| Ustilago spores             | 2                    |           | 0         |           | 0                      |           | 0         |           |
| Epicoccummasses             |                      |           |           |           |                        |           |           |           |
|                             | 0                    |           | 19        |           | 0                      |           | 0         |           |
| Conidiospores               | 0                    |           | 0         |           | 4                      |           | inf.      |           |
| Other                       | 6                    |           | 15        |           | 16                     |           | 9         |           |
| EXOTIC GRAINS*              |                      |           |           |           |                        |           |           |           |
|                             | 127                  |           | 186       |           | 13                     |           | 107       |           |
| ALIQOT SAMPLES (from 10 cc) |                      |           |           |           |                        |           |           |           |
|                             | 0.0033               | 0.33      | 0.0049    | 0.49      | 0.0003                 | 0.03      | 0.0028    | 0.028     |
| UNIDENTIFIED                |                      |           |           |           |                        |           |           |           |
|                             | 13                   | 14        | 4         | 4         | 8                      | 6         | 26        | 29        |

|         |   |   |   |   |   |   |   |   |
|---------|---|---|---|---|---|---|---|---|
| UNKNOWN | 1 | 1 | 0 | 0 | 1 | 1 | 0 | 0 |
|---------|---|---|---|---|---|---|---|---|

\*- To each 10 cc sample, 2 X 19,000 1,750 grains of Eucalyptus were added.

**TABLE D: Darby thrust timing relations**

| Location/reference                                                           | Stratigraphic/fault relationships                                                                          | Date limits                                                                  |
|------------------------------------------------------------------------------|------------------------------------------------------------------------------------------------------------|------------------------------------------------------------------------------|
| N. Wyoming Range<br>(Dorr et al. 1977)                                       | Darby thrust cuts late Cretaceous Frontier Fm.                                                             | post- late Cretaceous (Turonian;<82 Ma)                                      |
| Dixon (1982) cross sections 4-9                                              | Prospect and Darby share the same ramp                                                                     | post- latest Paleocene (Tiffanian;<56 Ma)                                    |
| McDougal Gap                                                                 | a) Darby thrust truncates late Cretaceous Hilliard Fm., overlain by McDougal Gap Conglomerate.             | post-late Cretaceous (Santonian;<78my)                                       |
|                                                                              | b) LaBarge Member of Wasatch Fm. (early Eocene) overlies Prospect thrust and is folded in Prospect thrust. | post-early Eocene (Graybullian < 53 my)                                      |
| Hoback and Green River Basins<br>(Dorr et al. 1977; Wiltschko and Dorr 1983) | Synorogenic early Paleocene Hoback Fm. and middle Paleocene Chappo Fm. shed from Darby thrust sheet.       | early-mid Paleocene (Tiffanian 58-60 my)                                     |
| La Barge area<br>(Dorr and Gingerich, 1980)                                  | Hogsback (Darby) thrust cuts late Cretaceous Adaville Fm, but doesn't offset middle Paleocene Chappo Fm.   | post- late Cretaceous-pre-middle Paleocene (Campanian-Tiffanian; <72->58 my) |
| LaBarge area<br>(Kraig et al. 1987)                                          | Geometric and kinematic constraints concerning the Moxa Arch, Darby-Hogsback and Prospect fault systems.   | post-latest Paleocene (Tiffanian; < 56 my)                                   |
| Solum and Van der Pluijm<br>(2007)                                           | Ar-Ar ages on Darby thrust gouge illite                                                                    | 48.6 Ma                                                                      |
